# Supplementary material
Source: PubMed Central journal article supplement (PMC3070558)
Supplement: mmc1.pdf [file mmc1.pdf]

**Table S1. List of spiking primers for pan-positive control assay.**

|                    |                                      |
|--------------------|--------------------------------------|
| Spi_AKT1_49G>A     | CTGTAGGGAAGTACATCAAGACCTGGCGGCAAAAA  |
| Spi_BRAF_1397G>T   | CCAAATGATACAGATCCAATTCTTTGTCCCAAAAA  |
| Spi_BRAF_1789C>G   | TAGCTACACCAAAATCACCTATTTTTACTGAAAAA  |
| Spi_BRAF_1799T>A   | CGAGATTTCTCTGTAGCTAGACCAAAATCAAAAAA  |
| Spi_BRAF_1406G>C   | GACTGTTGCAAATGATCCAGATCCAATTCTAAAAA  |
| Spi_EGFR_2155G>T   | GCACCGGAGCACAGCACTTTGATCTTTTTGAAAAA  |
| Spi_EGFR_2155G>A   | GCACCGGAGCTCAGCACTTTGATCTTTTTGAAAAA  |
| Spi_EGFR_2156G>C   | GCACCGGAGGCCAGCACTTTGATCTTTTTGAAAAA  |
| Spi_EGFR_2369C>T   | AGCTCATCATGCAGCTCATGCCCTTCGGCTAAAAA  |
| Spi_EGFR_2573T>G   | AGTTTGGCCCGCCAAAAATCTGTGATCTTGACAAA  |
| Spi_EGFR_2582T>A   | TGGCCAAACAGCTGGGTGCGGAAGAGAAAGAAAAA  |
| Spi_KRAS_181C>A    | ACTCCTCTTACCTGCTGTGTGCGAGAATATAAAAAA |
| Spi_KRAS_182A>G    | TACTCCTCTCGACCTGCTGTGTGCGAGAATAAAAA  |
| Spi_KRAS_182A>T    | TACTCCTCTAGACCTGCTGTGTGCGAGAATAAAAA  |
| Spi_KRAS_183A>C    | GCAGGTCACGAGGAGTACAGTGCAATGAGGAAAAA  |
| Spi_KRAS_183A>T    | GCAGGTCATGAGGAGTACAGTGCAATGAGGAAAAA  |
| Spi_KRAS_34G>A     | GTTGGAGCTAGTGGCGTAGGCAAGAGTGCCAAAAA  |
| Spi_KRAS_34G>C     | GTTGGAGCTCGTGGCGTAGGCAAGAGTGCCAAAAA  |
| Spi_KRAS_34G>T     | GTTGGAGCTTGTGGCGTAGGCAAGAGTGCCAAAAA  |
| Spi_KRAS_35G>A     | GCCTACGCCATCAGCTCCAAC TACCACAAGTTAAA |
| Spi_KRAS_35G>C     | GCCTACGCCAGCAGCTCCAAC TACCACAAGTTAAA |
| Spi_KRAS_35G>T     | GCCTACGCCAACAGCTCCAAC TACCACAAGTTAAA |
| Spi_KRAS_37G>A     | CCTACGCTACCAGCTCCAAC TACCACAAGTAAAAA |
| Spi_KRAS_37G>C     | CCTACGCGACCAGCTCCAAC TACCACAAGTAAAAA |
| Spi_KRAS_37G>T     | TTGCCTACGCAACCAGCTCCAAC TACCACAAAAAA |
| Spi_KRAS_38G>c     | GCCTACGGCACCAGCTCCAAC TACCACAAGAAAAA |
| Spi_KRAS_38G>A     | TTGCCTACGTACCAGCTCCAAC TACCACAAAAAA  |
| Spi_MEK1_167A>C    | TTCTGCTTCGGGGTAAGAAAGGCCTCAAGGAAAAA  |
| Spi_MEK1_171G>T    | CAGAATCAGAAGGTGGGAGA ACTGAAGGATGAAAA |
| Spi_MEK1_199G>A    | ATGACAAC TTTGAGAAGATCAGTGAGCTGGAAAAA |
| Spi_NRAS_181C>A    | ACTCTTCTTTTCCAGCTGTATCCAGTATGTAAAAA  |
| Spi_NRAS_182A>G    | ACTCTTCTCGTCCAGCTGTATCCAGTATGTAAAAA  |
| Spi_NRAS_182A>T    | ACTCTTCTAGTCCAGCTGTATCCAGTATGTAAAAA  |
| Spi_PIK3CA_1624G>A | TCCTCTCTCTAAAATCACTGAGCAGGAGAAAGAAA  |
| Spi_PIK3CA_1633G>A | CTCCTGCTTAGTGATTTTCAGAGAGAGGATCAAAAA |
| Spi_PIK3CA_1633G>C | CTCCTGCTGAGTGATTTTCAGAGAGAGGATCAAAAA |
| Spi_PIK3CA_3140A>G | ATGATGCACGTCATGGTGGCTGGACAACAATTTTT  |
| Spi_PTEN_697C>T    | GGACCCACATGACGGGAAGACAAGTTCATGTAAAA  |
