# Supplementary material
Source: PubMed Central journal article supplement (PMC3070558)
Supplement: mmc2.pdf [file mmc2.pdf]

**Table S2. List of PCR primers for direct sequencing.**

|                    |                                                     |
|--------------------|-----------------------------------------------------|
| Seq_BRAF_Ex_11_F   | <b>GTTTTCCCAGTCACGAC</b> TCTGTTTGGCTTGACTTGACTT     |
| Seq_BRAF_Ex_11_R   | <b>CAGGAAACAGCTATGAC</b> TCACCACATTACATACTTACCATGC  |
| Seq_BRAF_Ex_15_F   | <b>GTTTTCCCAGTCACGAC</b> TCATAATGCTTGCTCTGATAGGA    |
| Seq_BRAF_Ex_15_R   | <b>CAGGAAACAGCTATGAC</b> GGCCAAAAATTTAATCAGTGG      |
| Seq_EGFR_Ex_19_F   | <b>GTTTTCCCAGTCACGAC</b> GCAATATCAGCCTTAGGTGCGGCTC  |
| Seq_EGFR_Ex_19_R   | <b>CAGGAAACAGCTATGAC</b> CATAGAAAGTGAACATTTAGGATGTG |
| Seq_EGFR_Ex_20_F   | <b>GTTTTCCCAGTCACGAC</b> GAAACTCAAGATCGCATTTCATGC   |
| Seq_EGFR_Ex_20_R   | <b>CAGGAAACAGCTATGAC</b> GCAAACCTCTTGCTATCCCAGGAG   |
| Seq_EGFR_Ex_21_F   | <b>GTTTTCCCAGTCACGAC</b> TAACGTTTCGCCAGCCATAAG      |
| Seq_EGFR_Ex_21_R   | <b>CAGGAAACAGCTATGAC</b> CGAGCTCACCCAGAATGTC        |
| Seq_HER2_Ex20_F    | <b>GTTTTCCCAGTCACGAC</b> TTGTGATGGTTGGGAGGCTG       |
| Seq_HER2_Ex20_R    | <b>CAGGAAACAGCTATGAC</b> TGGACATAGGGGTTTGCTCC       |
| Seq_KRAS_Ex_1_F    | <b>GTTTTCCCAGTCACGAC</b> GGTGAGTTTGTATTTAAAAGG      |
| Seq_KRAS_Ex_1_R    | <b>CAGGAAACAGCTATGAC</b> AATGGTCAGAGAAACCTTTA       |
| Seq_KRAS_Ex_2_F    | <b>GTTTTCCCAGTCACGAC</b> GTCATCTTTGGAGCAGGAACAA     |
| Seq_KRAS_Ex_2_R    | <b>CAGGAAACAGCTATGAC</b> CCACCTATAATGGTGAATATCTTCA  |
| Seq_NRAS_Ex_2_F    | <b>GTTTTCCCAGTCACGAC</b> ATATTAGCAATTTGAGGGAC       |
| Seq_NRAS_Ex_2_R    | <b>CAGGAAACAGCTATGAC</b> ACTTGCTATTATTGATGGCA       |
| Seq_PIK3CA_Ex_9_F  | <b>GTTTTCCCAGTCACGAC</b> TGGTCTTTCTGTCTCTGAAA       |
| Seq_PIK3CA_Ex_9_R  | <b>CAGGAAACAGCTATGAC</b> GCTGAGATCAGCCAAATTCA       |
| Seq_PIK3CA_Ex_20_F | <b>GTTTTCCCAGTCACGAC</b> TGGGGTAAAGGGAATCAAAA       |
| Seq_PIK3CA_Ex_20_R | <b>CAGGAAACAGCTATGAC</b> ATCAAACCTGTTTGCGTTT        |
| Seq_PTEN_Ex_7_F    | <b>GTTTTCCCAGTCACGAC</b> TTGAAGGTTCAAACCTGGAGA      |
| Seq_PTEN_Ex_7_R    | <b>CAGGAAACAGCTATGAC</b> TGGATATTTCTCCCAATGAA       |
