# Supplementary material
Source: PubMed Central journal article supplement (PMC3070558)

**Table S4. SNaPshot and sizing assay results for fresh frozen lung adenocarcinoma samples.**

Among 24 samples, 11 mutations were detected: *EGFR*: 3 (13 %), *KRAS*: 6 (25%), *PIK3CA*: 1 (4.2%), and *NRAS*: 1 (4.2%). WT: wildtype. bps: basepairs. Ins: insertion. del – deletion.

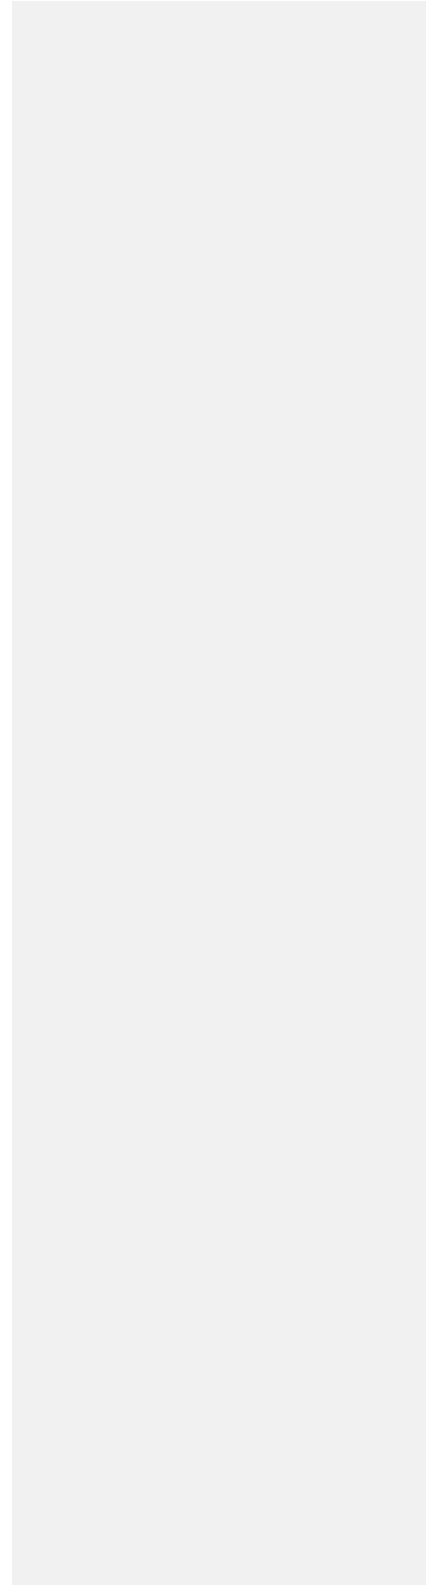

Supplement: mmc4.pdf [file mmc4.pdf]
