# Supplementary material
Source: PubMed Central journal article supplement (PMC3070558)
Supplement: mmc5.pdf [file mmc5.pdf]

**Table S5. SNaPshot and sizing assay results for FFPE-derived lung adenocarcinoma samples.** Among 49 samples, 23 mutations were found: *EGFR*: 12 (24.5%), *KRAS*: 10 (20.4%) and *PIK3CA*: 1 (2.0%). WT: wildtype. bps: basepairs. ins: insertion. del: deletion. n/a: not available due to small amount of DNA. N/A: data not available due to insufficient quantities of DNA. \*: these 11 samples were assessed independently by two different individuals in the laboratory and 100% concordance was obtained.
