# Supplementary material
Source: PubMed Central journal article supplement (PMC3070558)

Figure S2

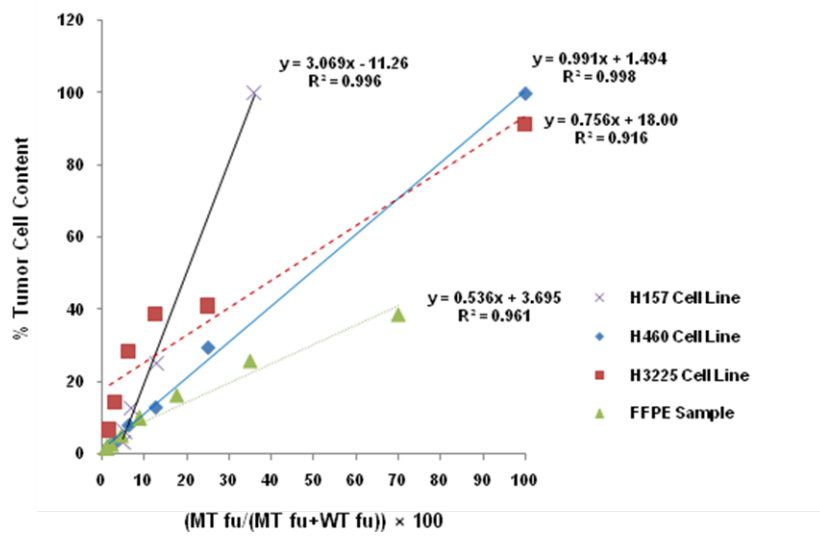

Supplement: mmc8.pdf [file mmc8.pdf]
